# Supplementary material
Source: publisher figshare collection journal article supplement (https://acs.figshare.com/ndownloader/files/3717991)
Supplement: Supplementary file 1 [file 3717991]

## Supporting Information

# Study on the Behavior of Halide Ions on the Au(111) Electrode Surface in Ionic Liquids Using Surface X-ray Scattering

*Kazuhisa Tamura\* and Yasuo Nishihata*

*Quantum beam science center, Japan Atomic Energy Agency, Koto 1-1-1, Sayo, Hyogo, 679-5148, Japan*

\* E-mail : tkazu@spring8.or.jp

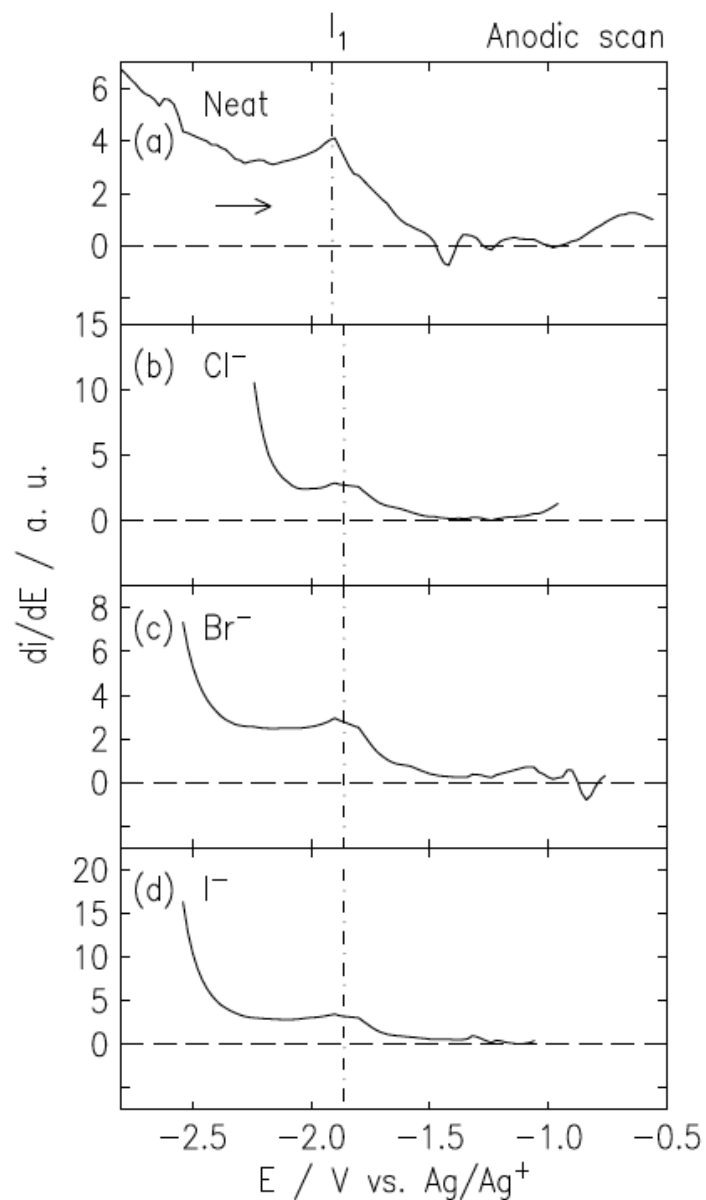

**Figure S1.** Differentials of current values in anodic scan in (a) neat [BMP]TFSA and [BMP]TFSA containing 2 mM (b)  $\text{Cl}^-$ , (c)  $\text{Br}^-$ , and (d)  $\text{I}^-$ . In anodic scan, no current peak was observed; however, an inflection point was observed. It is shown as  $I_1$ .  $I_1$  did not show ion species dependence.

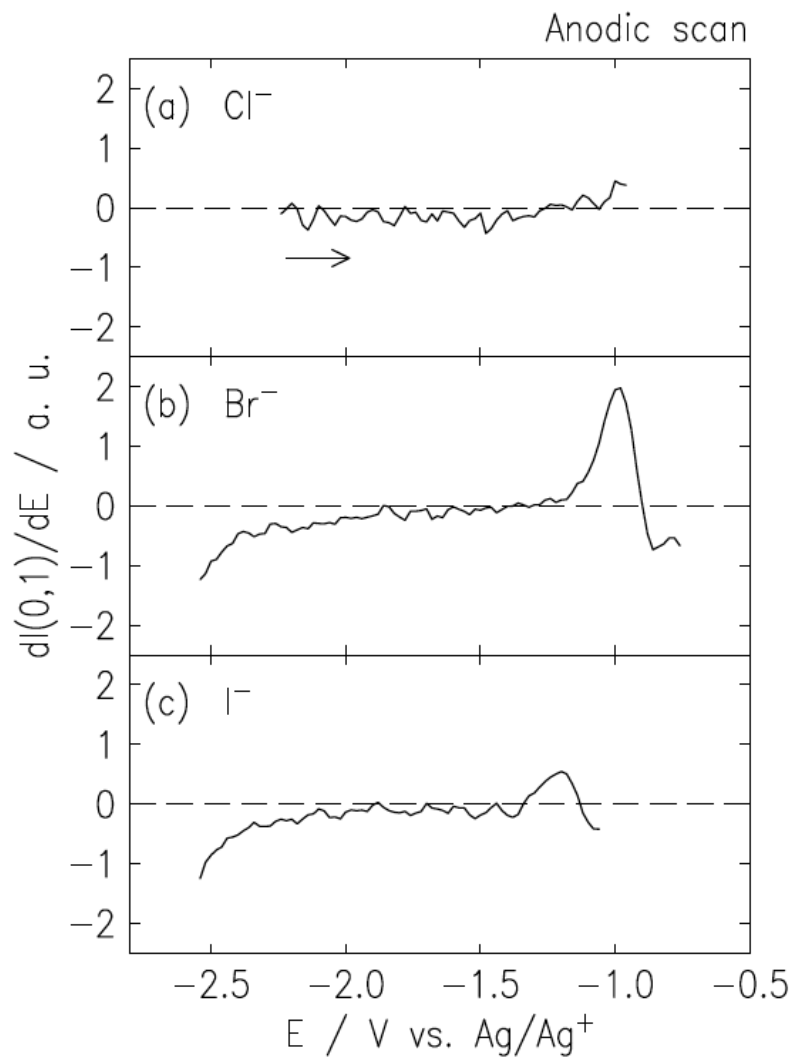

**Figure S2.** Differentials of X-ray intensity at (0, 1) in anodic scan in [BMP]TFSA containing 2 mM (a)  $\text{Cl}^-$ , (b)  $\text{Br}^-$ , and (c)  $\text{I}^-$ . In the three differentials, no common behavior was observed.

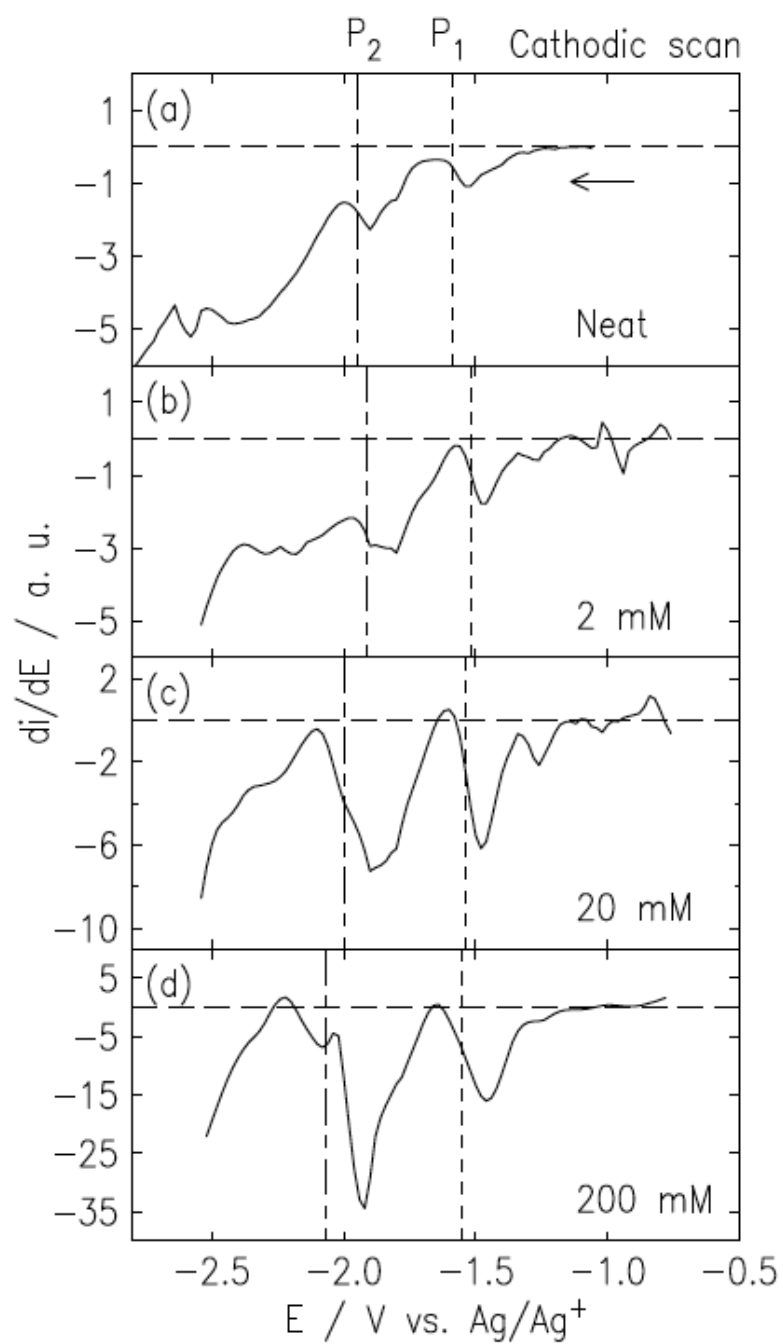

**Figure S3.** Differentials of current values in cathodic scan in  $[\text{BMP}]\text{TFSA}$  containing  $\text{Br}^-$ : (a) 2 mM, (b) 20 mM, and (c) 200 mM. Two current peaks were observed in CVs. They are shown as  $P_1$  and  $P_2$ . Only  $P_2$  showed the concentration dependence.

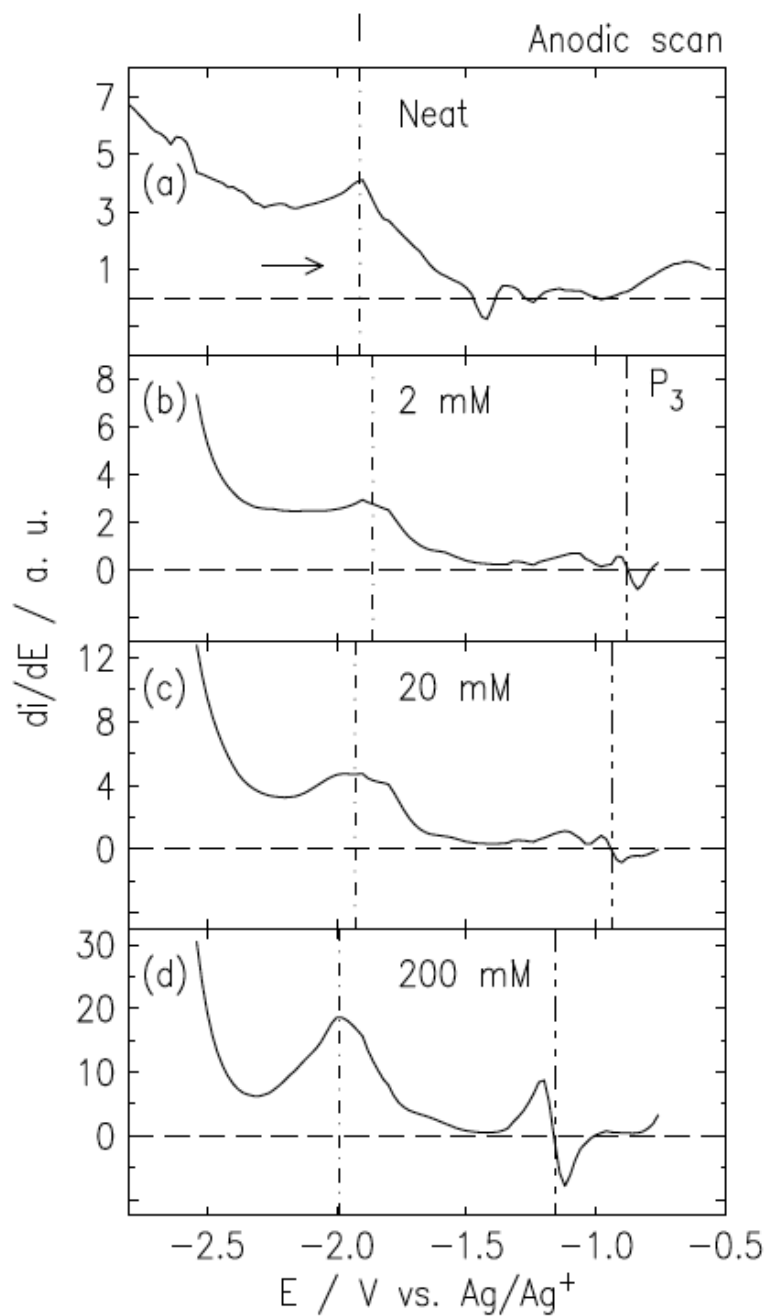

**Figure S4.** Differentials of current values in anodic scan in [BMP]TFSA containing  $\text{Br}^-$ : (a) 2 mM, (b) 20 mM, and (c) 200 mM. An inflection point and a peak were observed. The inflection point is shown as  $I$ . The Current peak is shown as  $P_3$ . Both  $I$  and  $P_3$  show concentration dependence.

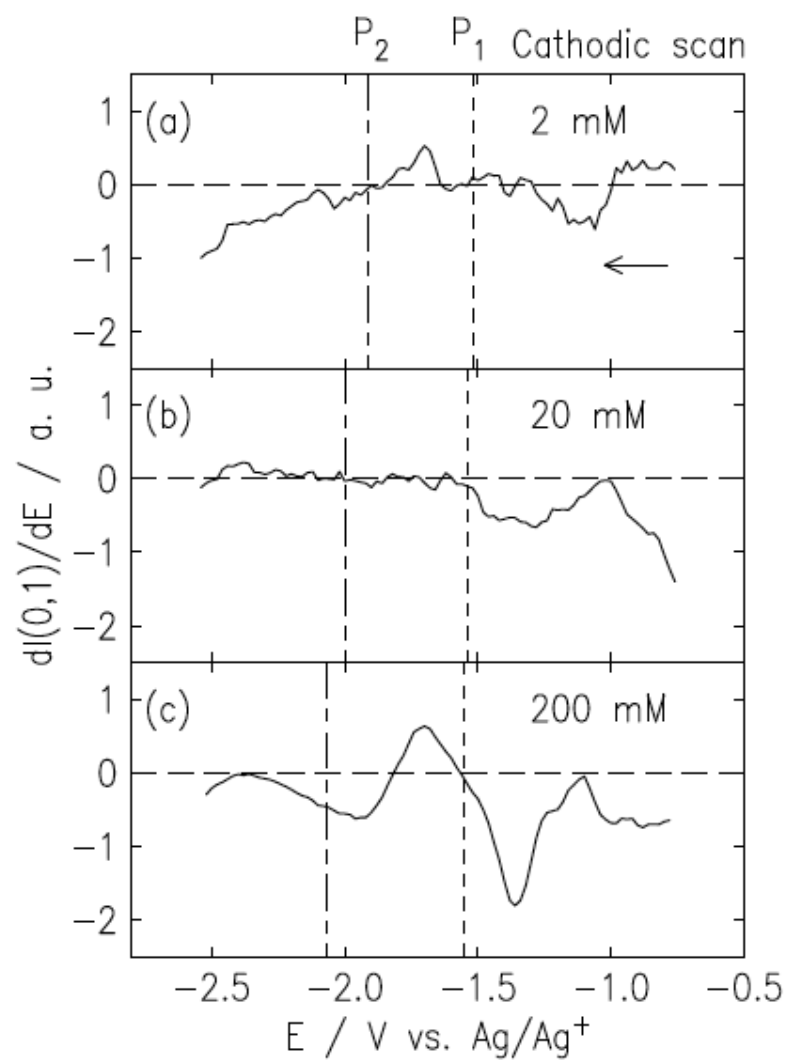

**Figure S5.** Differentials of X-ray intensity at (0, 1) in cathodic scan in [BMP]TFSA containing  $\text{Br}^-$ : (a) 2 mM, (b) 20 mM, and (c) 200 mM. Peak positions are shown as  $P_1$  and  $P_2$ . Common behavior was not clearly observed.

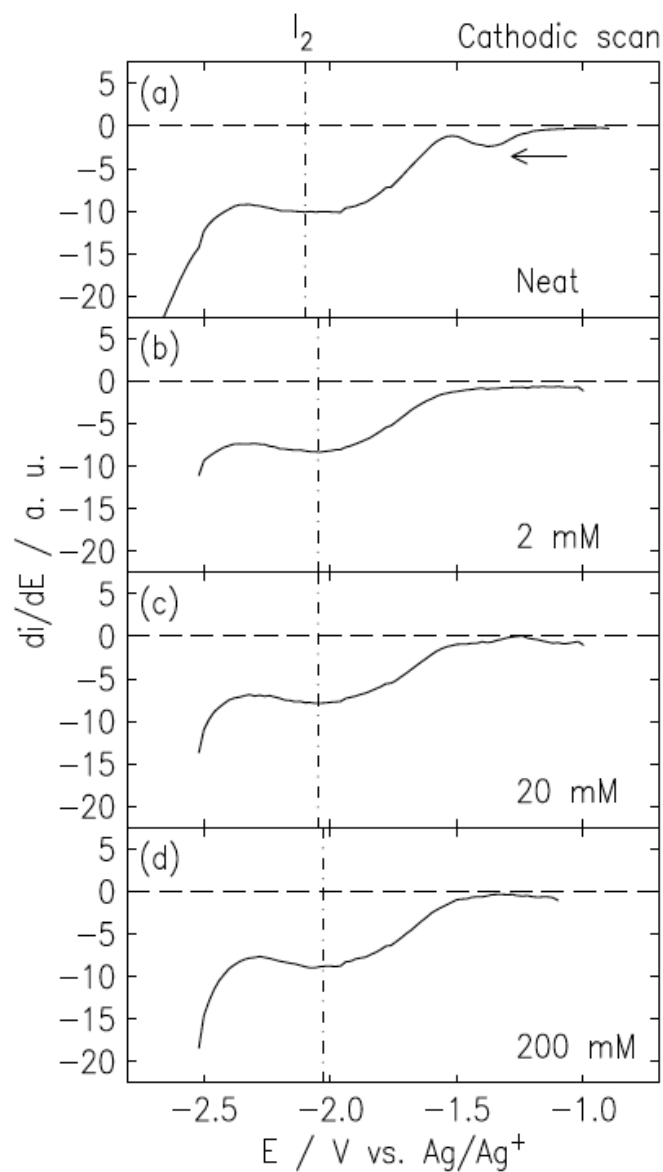

**Figure S6.** Differentials of current values in cathodic scan in [BMIM]TFSA containing  $\text{Br}^-$ : (a) 2 mM, (b) 20 mM, and (c) 200 mM. An inflection point is shown as  $I_2$ . In [BMIM]TFSA no concentration dependence was observed in  $I_2$ .

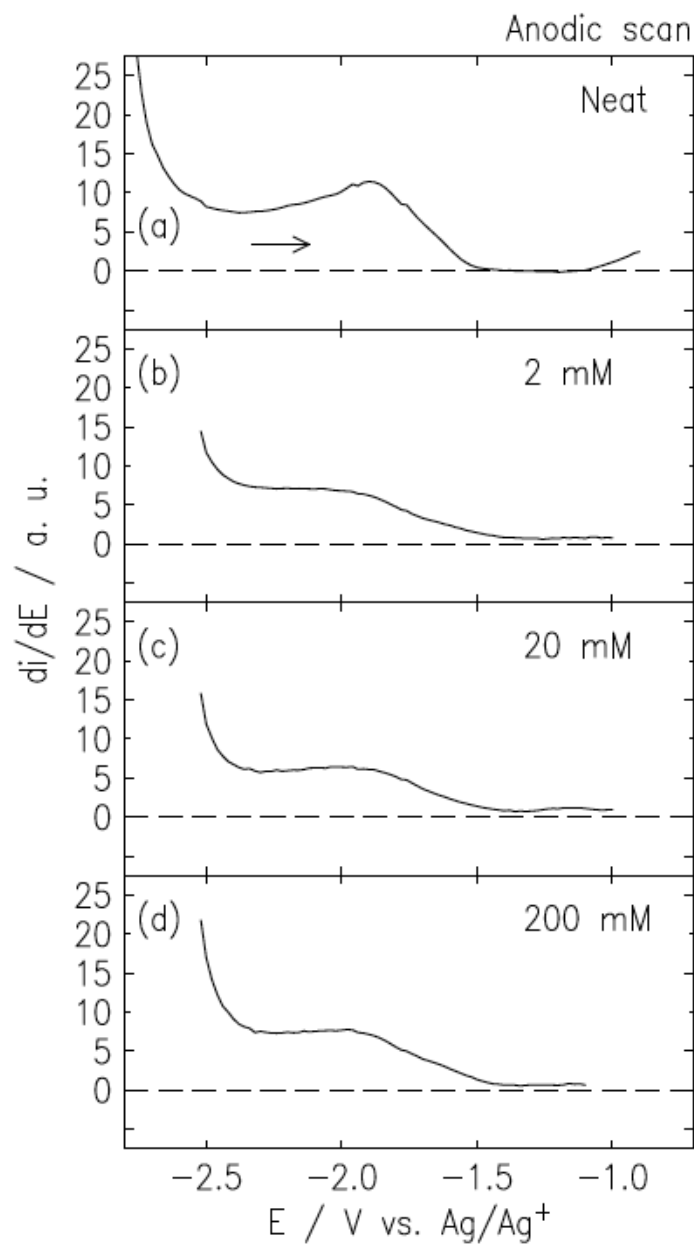

**Figure S7.** Differentials of current values in anodic scan in [BMIM]TFSA containing  $Br^-$ : (a) 2 mM, (b) 20 mM, and (c) 200 mM. As seen in the cathodic scan (Fig. S6), no concentration dependence was observed in the anodic scan.



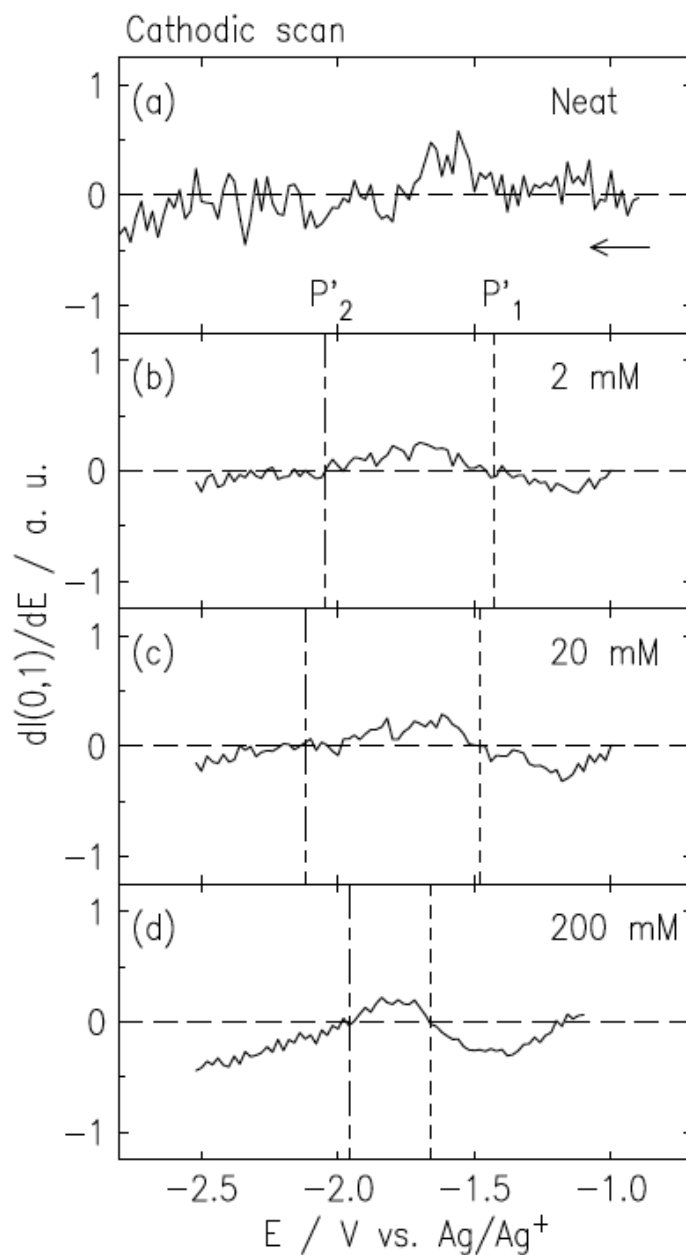

**Figure S8.** Differentials of X-ray intensity at (0, 1) in cathodic scan in [BMIM]TFSA containing  $\text{Br}^-$ : (a) 2 mM, (b) 20 mM, and (c) 200 mM. Peak positions are indicated by  $P'_1$  and  $P'_2$ . Strong concentration dependence was observed in the  $P'_1$  and  $P'_2$ .

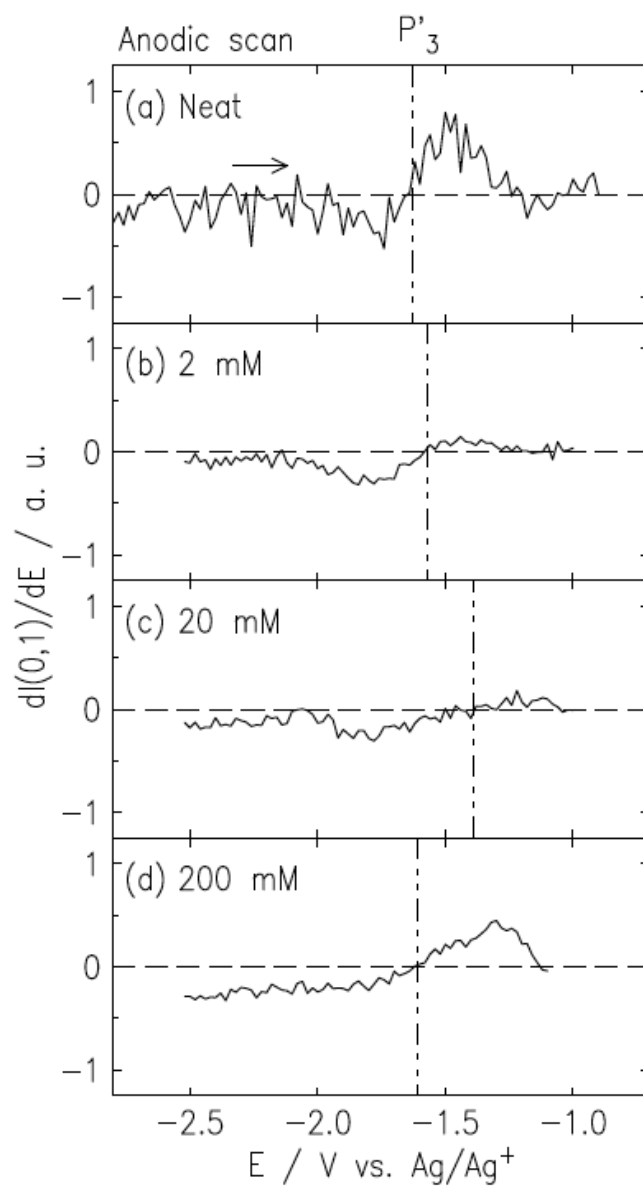

**Figure S9.** Differentials of X-ray intensity at (0, 1) in anodic scan in [BMIM]TFSa containing  $\text{Br}^-$ : (a) 2 mM, (b) 20 mM, and (c) 200 mM. A Peak position is indicated by  $P'_3$ . As seen in Figure S8, strong concentration dependence of in the  $P'_3$  and the common behavior of the intensity at (0,1) were observed.
